# Supplementary material for: Brief communications: changes in inflammatory biomarkers and lipid profiles after switching to long-acting cabotegravir plus rilpivirine
Source: PubMed Central journal article supplement (PMC10765943; doi:10.1186/s12981-023-00590-4), 2024-01-03
Supplement: 12981_2023_590_MOESM1_ESM.pdf [file 12981_2023_590_MOESM1_ESM.pdf]

Table Demographic characteristics at baseline

| ART regimen before switching                 |                             | All ART regimens | TAF-based Regimen | DTG-based Regimen | P value            |
|----------------------------------------------|-----------------------------|------------------|-------------------|-------------------|--------------------|
| n                                            |                             | 78               | 42                | 32                |                    |
| Age, years                                   |                             | 48 (26-64)       | 47 (26-64)        | 50 (28-64)        | 0.16*              |
| Gender                                       | Male                        | 76               | 41                | 31                | 0.999 <sup>†</sup> |
|                                              | Female                      | 2                | 1                 | 1                 |                    |
| Race                                         | Asians                      | 74               | 40                | 31                | 0.999 <sup>†</sup> |
|                                              | Other races <sup>‡</sup>    | 4                | 2                 | 1                 |                    |
| Current smoker, n (%)                        |                             | 16 (21)          | 8 (19)            | 8 (25)            | 0.78 <sup>†</sup>  |
| Alcohol consumption, n (%)                   |                             | 39(50)           | 24 (57)           | 13 (41)           | 0.24 <sup>†</sup>  |
| CD4 cell count, cells/ $\mu$ L               |                             | 655 (200-1210)   | 634 (200-1135)    | 656 (256-1210)    | 0.29*              |
| CD8 cell count, cells/ $\mu$ L               |                             | 694 (241-1874)   | 654 (241-1440)    | 795 (433-1874)    | 0.015*             |
| CD4/CD8 ratio                                |                             | 0.91 (0.21-2.88) | 0.94 (0.44-2.88)  | 0.82 (0.21-2.09)  | 0.32*              |
| HIV-RNA < 50 copies/mL, n (%)                |                             | 78 (100)         | 42 (100)          | 32 (100)          | 0.999 <sup>†</sup> |
| HIV-RNA undetectable, n (%)                  |                             | 63 (80.8)        | 32 (76)           | 26 (81)           | 0.78 <sup>†</sup>  |
| Body mass index, kg/m <sup>2</sup>           |                             | 24.2 (17.8-36.8) | 24.2 (17.8-36.8)  | 24.0 (19.2-32.3)  | 0.51*              |
| Time since diagnosis of HIV infection, years |                             | 11.8 (0.83–33.4) | 12.2 (1.83–33.4)  | 11.2 (0.83–27)    | 0.85*              |
| ART duration, years                          |                             | 10.3 (0.63-29.7) | 10.04 (1.58-29.7) | 10.75 (0.63-27)   | 0.64*              |
| Complications, n (%)                         | Hypertension                | 14 (18)          | 6 (14)            | 8 (25)            | 0.37 <sup>†</sup>  |
|                                              | Diabetes                    | 8 (10)           | 5 (12)            | 3(9.4)            | 0.999 <sup>†</sup> |
|                                              | Dyslipidemia                | 21 (27)          | 11 (26)           | 7 (22)            | 0.78 <sup>†</sup>  |
| HIV-1 subtype <sup>§</sup>                   | B                           | 69               | 36                | 29                | 0.999 <sup>†</sup> |
|                                              | Other subtypes <sup>§</sup> | 7                | 4                 | 3                 |                    |
| ART regimen before switch, n                 | DTG/3TC                     | 30               | 0                 | 30                | NA                 |
|                                              | B/F/TAF                     | 37               | 37                | 0                 |                    |
|                                              | Other regimens              | 11               | 5                 | 2                 |                    |

Data are n or median (range). P values were calculated comparing the TAF-based regimen group with the DTG-based regimen group. \* Mann-Whitney U test, <sup>†</sup> Fisher's exact test, <sup>‡</sup> Southeast Asian 1, Latin American, and 2 Caucasian 1. <sup>§</sup> The other subtypes were AG 3, AE 1, D 2, and G 1. No data for 2 individuals. ART, antiretroviral therapy; TAF, emtricitabine/tenofovir alafenamide; DTG/3TC, dolutegravir plus lamivudine; B/F/TAF, bictegravir/emtricitabine/tenofovir alafenamide.
