# Supplementary material for: Brief communications: changes in inflammatory biomarkers and lipid profiles after switching to long-acting cabotegravir plus rilpivirine
Source: PubMed Central journal article supplement (PMC10765943; doi:10.1186/s12981-023-00590-4), 2024-01-03
Supplement: 12981_2023_590_MOESM2_ESM.pdf [file 12981_2023_590_MOESM2_ESM.pdf]

Additional file 2

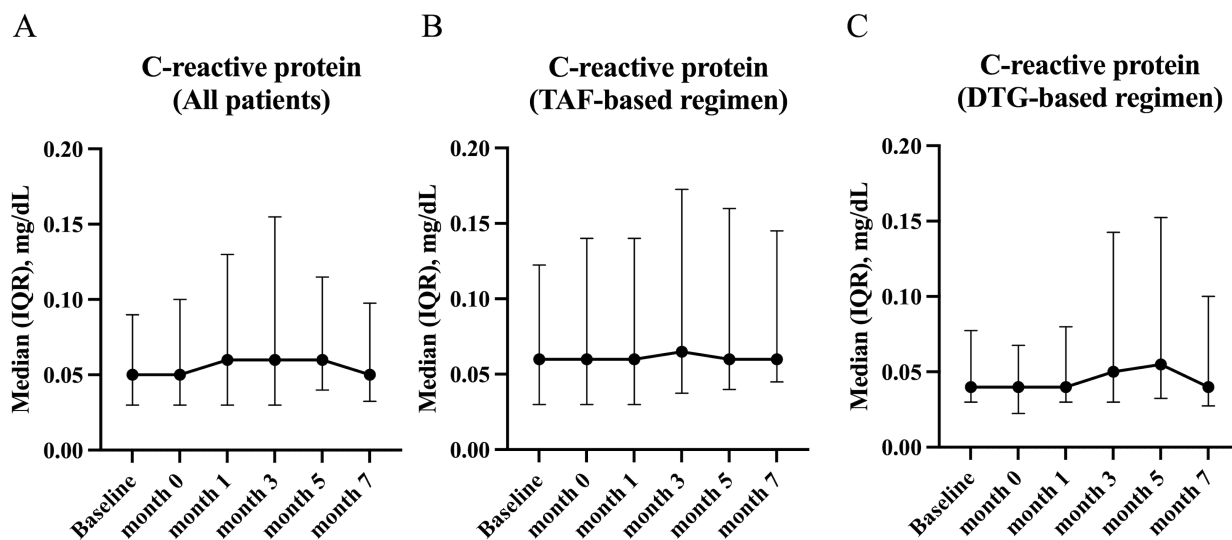

Figure. Changes in C-reactive protein after switching to cabotegravir plus rilpivirine. The changes in C-reactive protein after switching to cabotegravir plus rilpivirine in all patients (A), TAF-based regimen group (B), and DTG-based regimen group (C), respectively, are shown. Baseline, at the start of oral-lead-in; month 0, at the start of injectable cabotegravir plus rilpivirine. TAF, tenofovir alafenamide; DTG, dolutegravir
